# Supplementary material
Source: Springer Nature journal article supplement (https://www.springermedizin.de/resource/supplementary/13023_2009_324_MOESM6_ESM.pdf/9642112)
Supplement: MOESM6 [file 9642112]

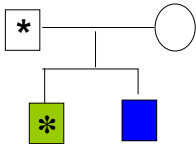

HUS at 5m

HUS at 8m

*CFI G243D*\*

No mutation

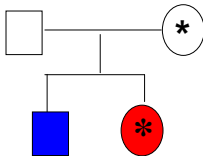

HUS at 3y

HUS at day 3

No mutation

*CFH A161S*\*

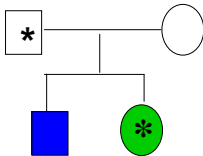

HUS at 8m

HUS at 3m

No mutation

*CFI C453R*\*
